# Supplementary material for: Association of Cerebral Venous Thrombosis with mRNA COVID-19 Vaccines: A Disproportionality Analysis of the World Health Organization Pharmacovigilance Database
Source: Vaccines (Basel). 2022 May 18;10(5):799. doi: 10.3390/vaccines10050799 (PMC9145068; doi:10.3390/vaccines10050799)
Supplement: Supplementary file 1 [file vaccines-10-00799-s001.zip › vaccines-1681648-supplementary.pdf]

## Supplementary Material

### 1. Supplementary Table S1. Mortality of patients with cerebral venous thrombosis after COVID-19 vaccination among vaccine types.

|           | BNT162b2<br>(n = 620) | mRNA-1273<br>(n = 136) | ChAdOx1<br>nCoV-19<br>(n = 757) | BNT162b2<br>vs. ChAdOx1 nCoV-19 |                | mRNA-1273<br>vs. ChAdOx1 nCoV-19 |                | BNT162b2<br>vs. mRNA-1273 |                | mRNA-based<br>vs. ChAdOx1 nCoV-19 |                |
|-----------|-----------------------|------------------------|---------------------------------|---------------------------------|----------------|----------------------------------|----------------|---------------------------|----------------|-----------------------------------|----------------|
|           | Number (%)            | Number (%)             | Number (%)                      | Odds ratio<br>(95% CI)          | <i>P</i> value | Odds ratio<br>(95% CI)           | <i>P</i> value | Odds ratio<br>(95% CI)    | <i>P</i> value | Odds ratio<br>(95% CI)            | <i>P</i> value |
| Mortality | 44 (7.0%)             | 5 (4.0%)               | 135 (18.0%)                     | 0.35<br>(0.25–0.50)             | < 0.001        | 0.18<br>(0.07–0.44)              | < 0.001        | 2.00<br>(0.77–6.59)       | 0.60           | 0.32<br>(0.22–0.45)               | < 0.001        |

Abbreviation: CI, confidence interval

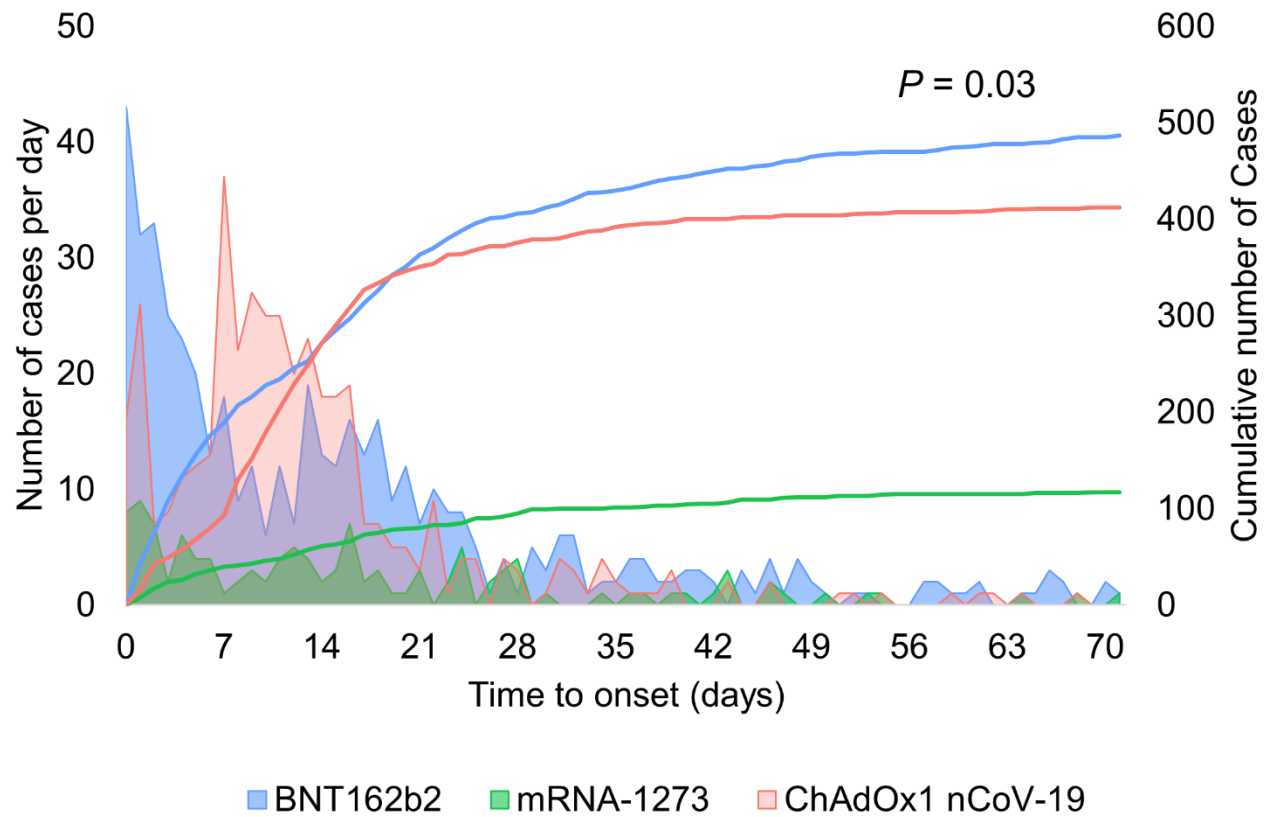

**Supplementary Figure S1. The daily numbers of cerebral venous thrombosis cases and the cumulative frequency for all the vaccines for the entire period.**

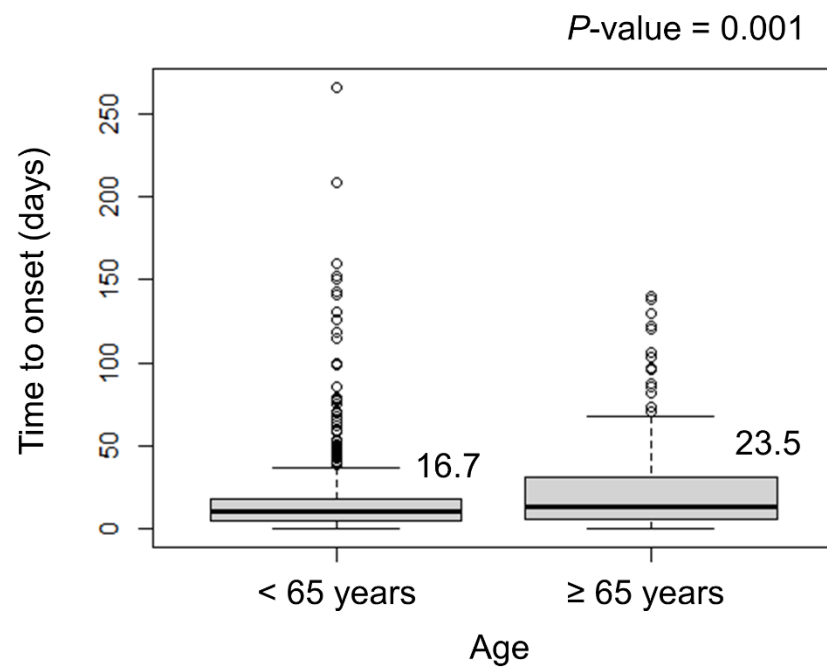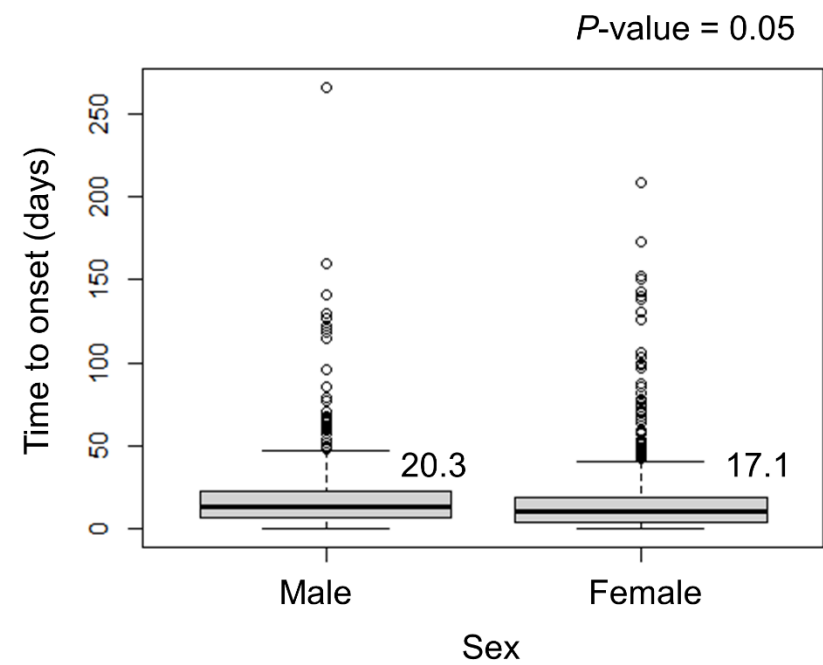

**Supplementary Figure S2. The time to onset of cerebral venous thrombosis after COVID-19 vaccination between age and sex.**
